# Supplementary material
Source: Springer Nature journal article supplement (https://www.springermedizin.de/resource/supplementary/12957_2008_516_MOESM7_ESM.pdf/9564894)

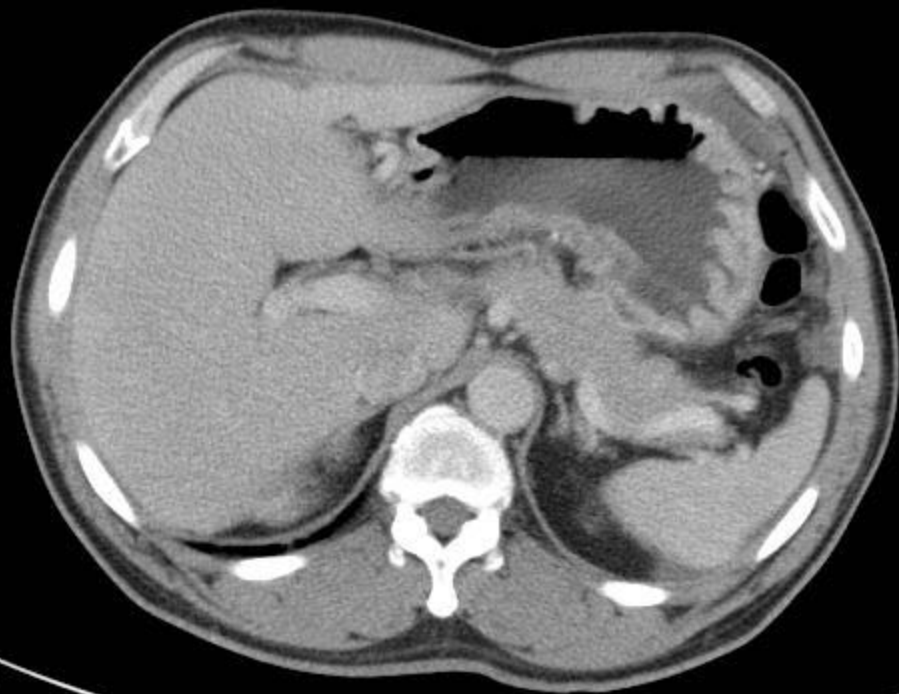

Supplement: MOESM7 [file 9564894]
